# Supplementary material for: A propeller-shaped perylene diimide hexamer as a nonfullerene acceptor for organic solar cells
Source: Royal Society of Chemistry journal article supplement (doi:10.1039/c8tc03081b), 2018-01-01
Supplement: c8tc03081b1.pdf [file c8tc03081b1.pdf]

## Supporting Information

### A Propeller-Shaped Perylene Diimides Hexamer as Nonfullerene Acceptor for Organic Solar Cells

Juncheng Liu, Sufei Xie, Shiyu Feng, Miao Li, Liangliang Wu, Xinjun Xu\*, Xuebo Chen, Cuihong Li\* and Zhishan Bo\*<sup>a</sup>

<sup>a</sup>Beijing Key Laboratory of Energy Conversion and Storage Materials, College of Chemistry, Beijing Normal University, Beijing 100875, China.

\*E-mail: [licuihong@bnu.edu.cn](mailto:licuihong@bnu.edu.cn), [xuxj@bnu.edu.cn](mailto:xuxj@bnu.edu.cn), [zsbo@bnu.edu.cn](mailto:zsbo@bnu.edu.cn)

## Experimental section

The structure of **HPB-PDI**<sub>6</sub> was characterized by MALDI-TOF mass spectroscopy and elemental analysis. Compounds **1**<sup>s1</sup> (5-bromo-2,9-bis(1-hexylheptyl)anthra[2,1,9-def:6,5,10-d'e'f']diiso-quinoline-1,3,8,10(2H,9H)-tetrone) and **2**<sup>s2</sup> (1,2-Bis(4-(4,4,5,5-tetramethyl-1,3,2-dioxaborolan-2yl)phenyl)acetylene) were prepared according to the literature procedures.

### Procedures for the synthesis of compound **3**

A mixture of compound **1** (485 mg, 0.58 mmol), compound **2** (100 mg, 0.23 mmol), THF (40 mL) and H<sub>2</sub>O (4 mL) was carefully degassed before and after Pd(PPh<sub>3</sub>)<sub>4</sub> (0.012 mmol, 13.4 mg) was added. The mixture was stirred at reflux under N<sub>2</sub> for 72 h. After evaporation of the solvent under vacuum, the crude product was extracted twice with dichloromethane. The combined organic phase was dried over anhydrous MgSO<sub>4</sub>. After removal of the solvent, the residue was purified by column chromatography on silica gel using petroleum ether/dichloromethane (v/v = 1:2) as an eluent to afford compound

**3** (302 mg, 77%) as a red solid.  $^1\text{H}$  NMR (500 MHz,  $\text{CDCl}_3$ ,  $\delta$ ): 8.70-8.59 (m, 10H), 8.22-8.19 (m, 2H), 7.93-7.91 (d,  $J = 8.0$  Hz, 2H), 7.77-7.75 (d,  $J = 8.0$  Hz, 4H), 7.57-7.55 (d,  $J = 8.1$  Hz, 4H), 5.22-5.15 (m, 4H), 2.28-2.23 (m, 8H), 1.87-1.84 (m, 8H), 1.33-1.22 (m, 66H), 0.85-0.81 (m, 22H);  $^{13}\text{C}$  NMR (125 MHz,  $\text{CDCl}_3$ ,  $\delta$ ): 164.79, 163.73, 142.68, 140.83, 136.17, 135.47, 134.86, 134.37, 133.61, 132.65, 131.62, 130.86, 130.18, 129.85, 129.20, 128.85, 128.65, 128.12, 127.55, 123.98, 123.62, 123.48, 123.01, 122.38, 90.52, 32.39, 31.78, 29.71, 29.23, 26.92, 22.60, 14.06. Anal. calcd for  $\text{C}_{114}\text{H}_{130}\text{N}_4\text{O}_8$  (%): C, 81.29; H, 7.78; N, 3.33. Found (%): C, 81.03; H, 7.80; N, 3.32.

#### Procedures for the synthesis of **HPB-PDI<sub>6</sub>**

A toluene (5 mL) solution of compound **3** (200 mg, 119  $\mu\text{mol}$ ) and  $\text{Co}_2(\text{CO})_8$  (5 mg, 0.015 mmol) was stirred under nitrogen atmosphere at 110 °C for 24 h. After removal of the solvent, the residue was chromatographically separated on silica gel (eluent; hexane/ $\text{CH}_2\text{Cl}_2$  1:4) to give **HPB-PDI<sub>6</sub>** as a red solid (96 mg, 48%).  $^1\text{H}$  NMR (400 MHz,  $\text{CDCl}_3$ ,  $\delta$ ): 8.49-8.41 (m, 6H), 8.12-8.10 (m, 2H), 7.92-7.45 (m, 3H), 5.04-4.75 (m, 2H), 2.12-1.89 (m, 4H), 1.73-1.60 (m, 4H), 1.18-0.79 (m, 44H);  $^{13}\text{C}$  NMR (100 MHz,  $\text{CDCl}_3$ ,  $\delta$ ): 164.5, 163.7, 163.5, 163.4, 140.7, 140.6, 140.4, 135.0, 134.9, 134.7, 129.2, 128.9, 128.5, 128.3, 128.2, 127.7, 127.6, 123.4, 123.3, 122.9, 122.5, 54.6, 54.0, 32.3, 32.2, 32.0, 31.7, 29.2, 29.1, 26.8, 26.6, 22.6, 22.4, 14.1, 13.7. Anal. calcd for  $\text{C}_{342}\text{H}_{390}\text{N}_{12}\text{O}_{24}$  (%): C, 81.29; H, 7.78; N, 3.33. Found (%): C, 81.15; H, 7.82; N, 3.30. MALDI-TOF ( $m/z$ ): Calcd. for  $\text{C}_{342}\text{H}_{390}\text{N}_{12}\text{O}_{24}$ : 5071.955  $[\text{M}+\text{Na}]^+$ , Found 5071.952  $[\text{M}+\text{Na}]^+$ .

## Measurements and characterization

Unless otherwise mentioned, all reactions were monitored by thin layer chromatography (TLC).  $^1\text{H}$  and  $^{13}\text{C}$  spectra were recorded on a Bruker AV 500 and JEOL 400M spectrometer. MS (MALDI-TOF) results were performed with an Autoflex III instrument. UV-visible absorption spectra were obtained on a PerkinElmer UV-vis spectrometer model Lambda 750. The electrochemical properties were investigated by cyclic voltammetry (CHI 630A Electrochemical Analyzer) with a three-electrode electrochemical cell in a 0.1 M  $\text{Bu}_4\text{NPF}_6$   $\text{CH}_3\text{CN}$  solution under nitrogen atmosphere with a scanning rate of 0.1 V/s. A Pt plate working electrode, a Pt wire counter electrode, and an  $\text{Ag}/\text{AgNO}_3$  (0.01 M in  $\text{CH}_3\text{CN}$ ) reference electrode were used. The ferrocene/ferrocenium ( $\text{Fc}/\text{Fc}^+$ ) redox couple was regarded as the internal reference standard. Transmission electron microscopy (TEM) was performed on FEI Technai TF20 (Philip) transmission electron microscopy. Atomic force microscopy (AFM) measurements were performed under ambient conditions using a Digital Instrument Multimode Nanoscope IIIA in the tapping mode. The thickness of the blend films was obtained by a Dektak 6 M surface profilometer. The powder X-ray diffraction (XRD) patterns were collected using a PANalytical X'Pert PRO MPD diffractometer with  $\text{Cu}$  KR radiation.

## Polymer Solar Cell Fabrication and Characterization

OSCs were fabricated with the device configuration of  $\text{ITO}/\text{ZnO}/\text{PTB7-Th:Acceptor}/\text{MoO}_3(85 \text{ \AA})/\text{Ag}(100 \text{ nm})$ . The conductivity of ITO was  $15 \text{ } \Omega$ . The ITO-coated glass were washed by deionized water, acetone, isopropanol and deionized water

successively. The glass were dried at 150°C for 15 minutes, the sol-gel ZnO (30 nm) were spin-coated on them and annealed at 200°C for 30 minutes. The blends of **PTB7-Th** and acceptor in 1,2-dichlorobenzene (DCB) with the polymer concentration of 10mg ml<sup>-1</sup> was stirred at 90°C for 3 hours to ensure a sufficient dissolution, and the solution was spin-coated onto the ZnO layer. Followed 8.5 nm thick MoO<sub>3</sub> film and 100 nm thick Ag layer were deposited sequentially to complete the device. Six cells with an 0.04 cm<sup>2</sup> each effective area were fabricated on one substrate. Current-voltage (I-V) and external quantum efficiency (EQE) measurements were performed in air without encapsulation.

The current-voltage characteristics were recorded at approximately 25°C using an Agilent B2902A Source Meter under the illumination of an AM1.5G AAA class solar simulator (model XES-301S, SAN-EI) with an intensity of 100 mWcm<sup>-2</sup> as the white light source, and the white light intensity was calibrated with a standard photovoltaic cell equipped with a KG5 filter (certificated by the National Institute of Metrology) and a Keithley 2400 source-measure unit. The EQE data were obtained using a solar cell spectral response measurement system (QER3011, Enli Technology Co. Ltd). A calibrated silicon detector was used to determine the absolute photo sensitivity at different wavelengths.

### **Space-Charge Limited Current Measurement**

Devices with hole-only device structure of ITO/PEDOT:PSS (30 nm)/**PTB7-Th:Acceptor**/Au (100 nm) and electron-only configuration of FTO/**PTB7-Th:Acceptor**/Al (100 nm) were fabricated.

Dark  $J$ - $V$  curves of the hole-only devices and electron-only devices were taken by the space-charge limited current (SCLC) method. The dark  $J$ - $V$  curves of the devices were based on the Mott–Gurney equation:  $J = 9\varepsilon_0\varepsilon_r\mu V^2/8L^3$ . Here  $J$  is the space-charge limited current,  $\varepsilon_0$  is the vacuum permittivity,  $\varepsilon_r$  is the permittivity of the active layer,  $\mu$  is the hole mobility or the electron mobility, and  $L$  is the thickness of the active layer.

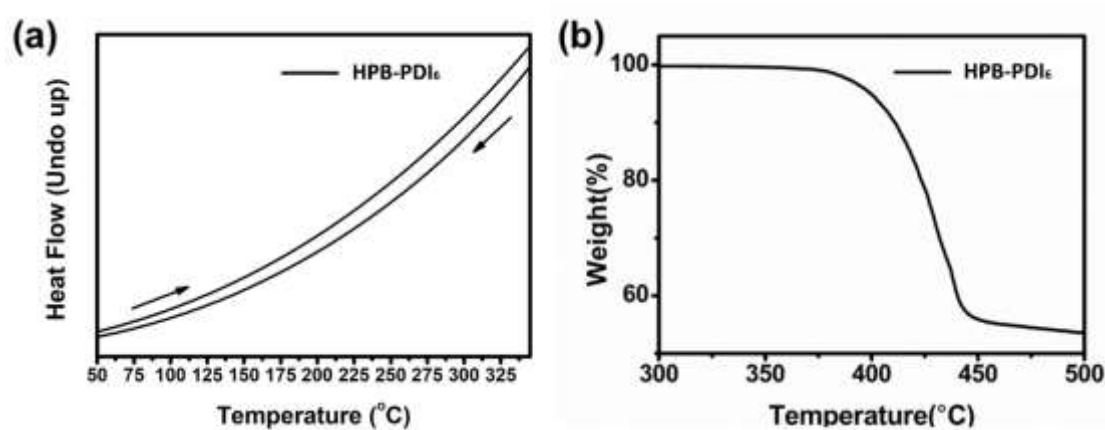

**Figure S1.** (a) DSC plot of **HPB-PDI<sub>6</sub>** with a heating rate of 10°C/min under N<sub>2</sub> atmosphere, (b) TGA curves of **HPB-PDI<sub>6</sub>** with a heating rate of 10°C /min under N<sub>2</sub> atmosphere

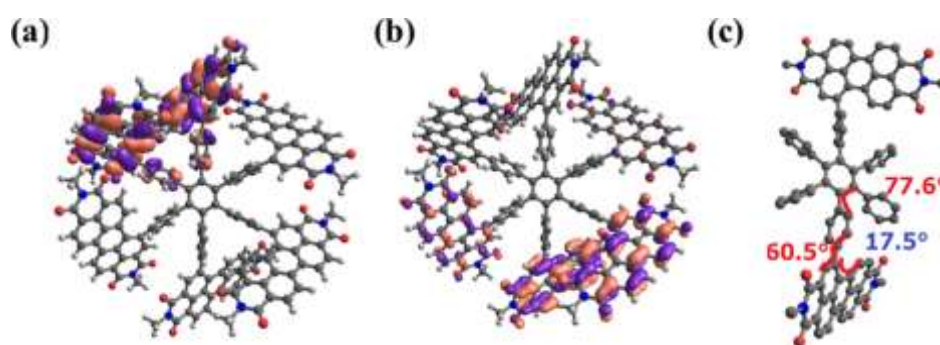

**Figure S2.** HOMO (a, -5.85 eV) and LUMO (b, -3.49 eV) orbitals of **HPB-PDI<sub>6</sub>**; The schematic diagram of torsion angles in the optimized geometry of **HPB-PDI<sub>6</sub>** (c).

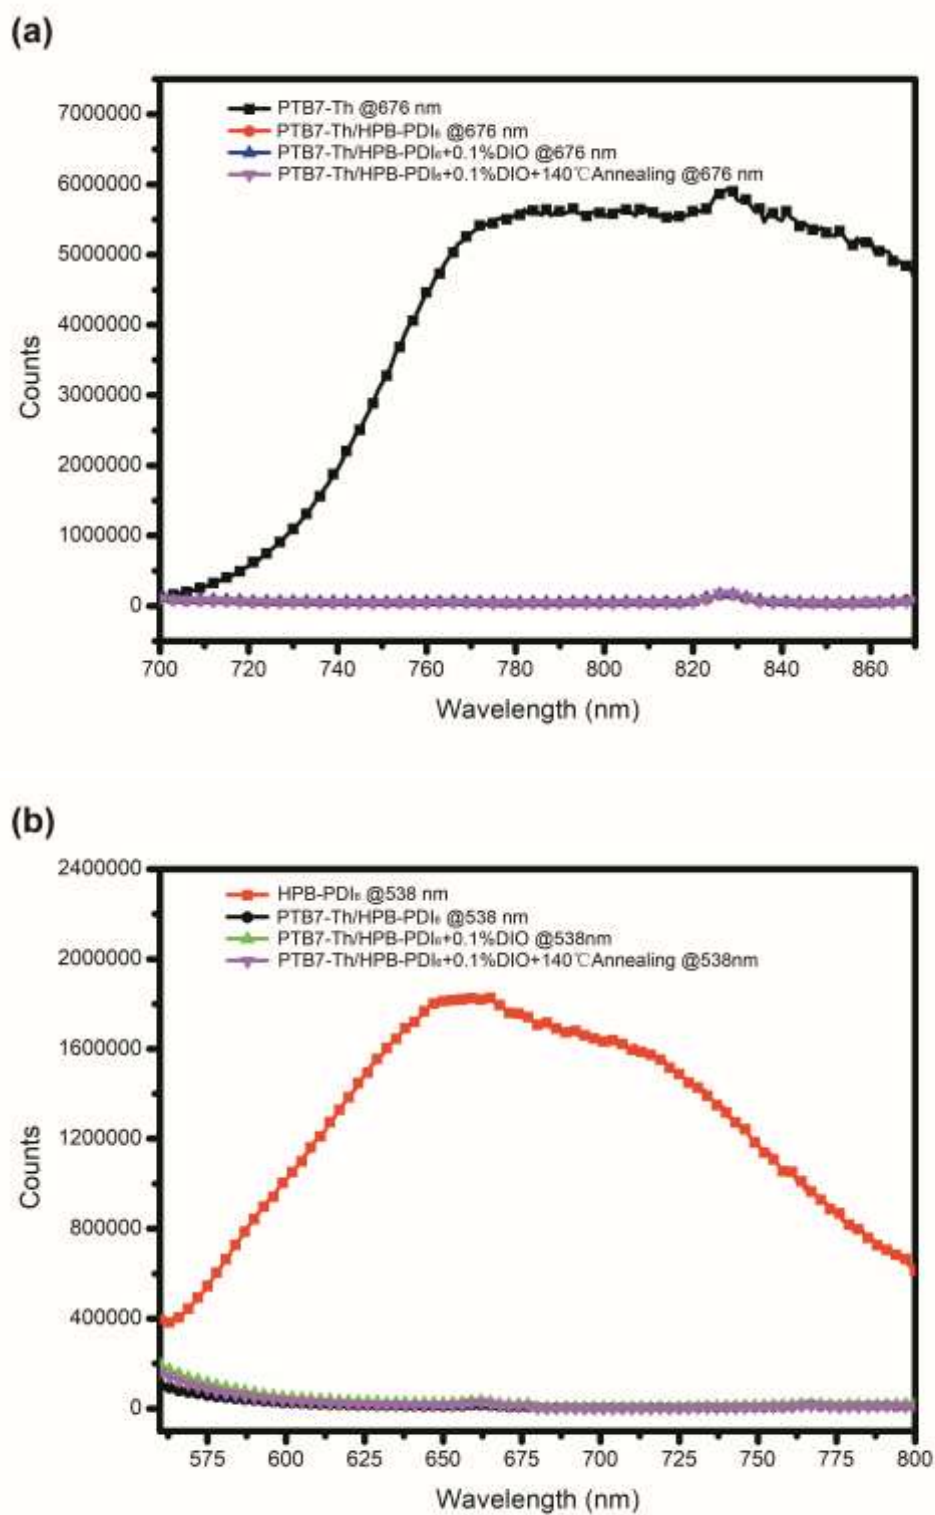

**Figure S3.** Photoluminescence quenching experiment of (a) the pristine PTB7-Th film, the PTB7-Th/HPB-PDI<sub>6</sub> blend film, the PTB7-Th/HPB-PDI<sub>6</sub> with 0.1%DIO film and

the PTB7-Th/**HPB-PDI**<sub>6</sub> with 0.1% DIO film and annealing at 140 °C for 5 minutes; (b) the pristine **HPB-PDI**<sub>6</sub> film and PTB7-Th/**HPB-PDI**<sub>6</sub> blend film at different conditions.

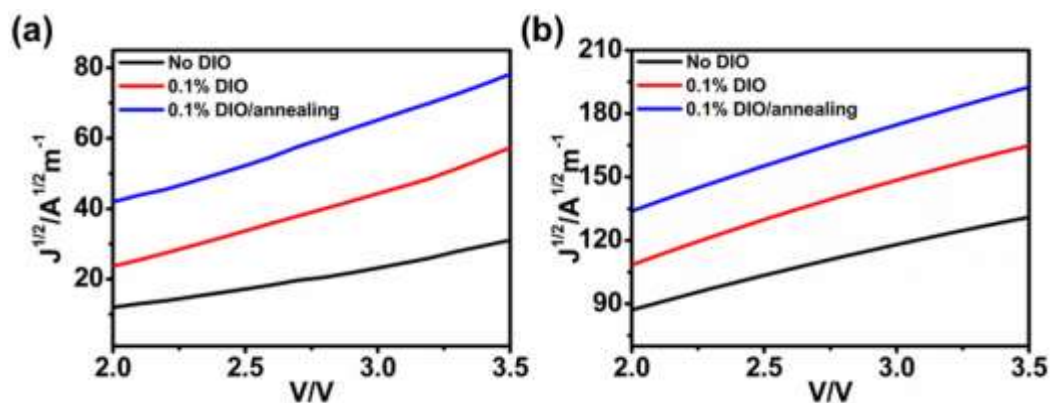

**Figure S4.**  $J^{1/2}$ - $V$  curves of PTB7-Th: **HPB-PDI**<sub>6</sub> based devices for  $\mu_e$  (a) and  $\mu_h$  (b) by SCLC.

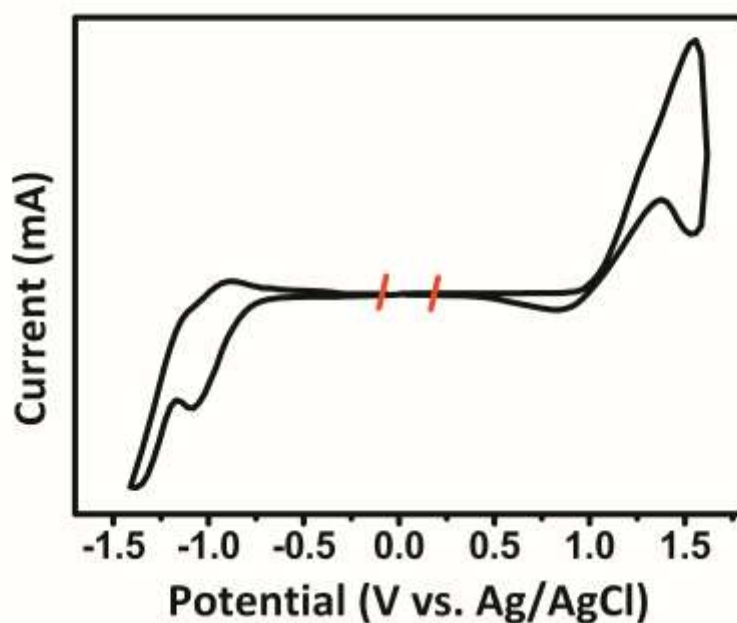

**Figure S5.** Cyclic voltammograms of **HPB-PDI**<sub>6</sub> in acetonitrile solution containing 0.1M  $\text{Bu}_4\text{NPF}_6$  using Ag/AgCl as the reference electrode

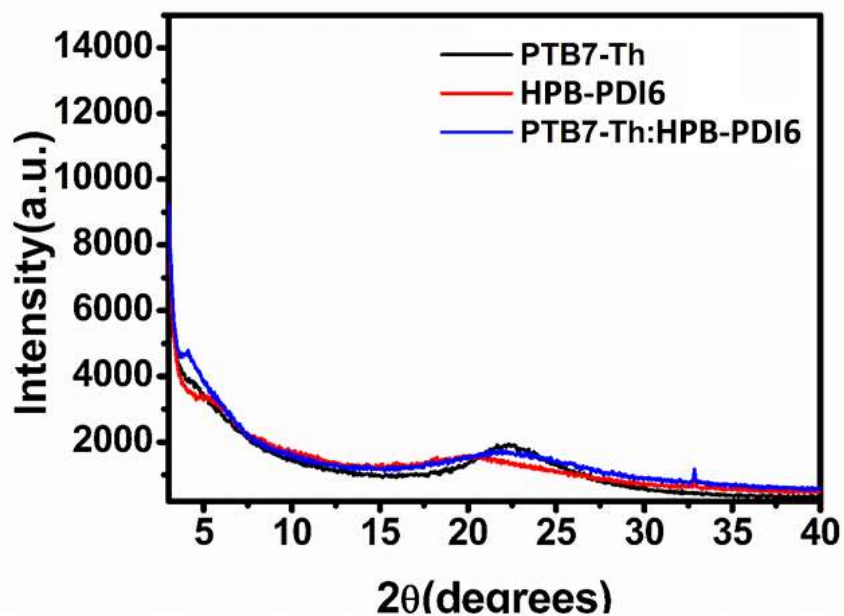

Figure S6. XRD images of PTB7-Th, HPB-PDI<sub>6</sub> and PTB7-Th: HPB-PDI<sub>6</sub> films.

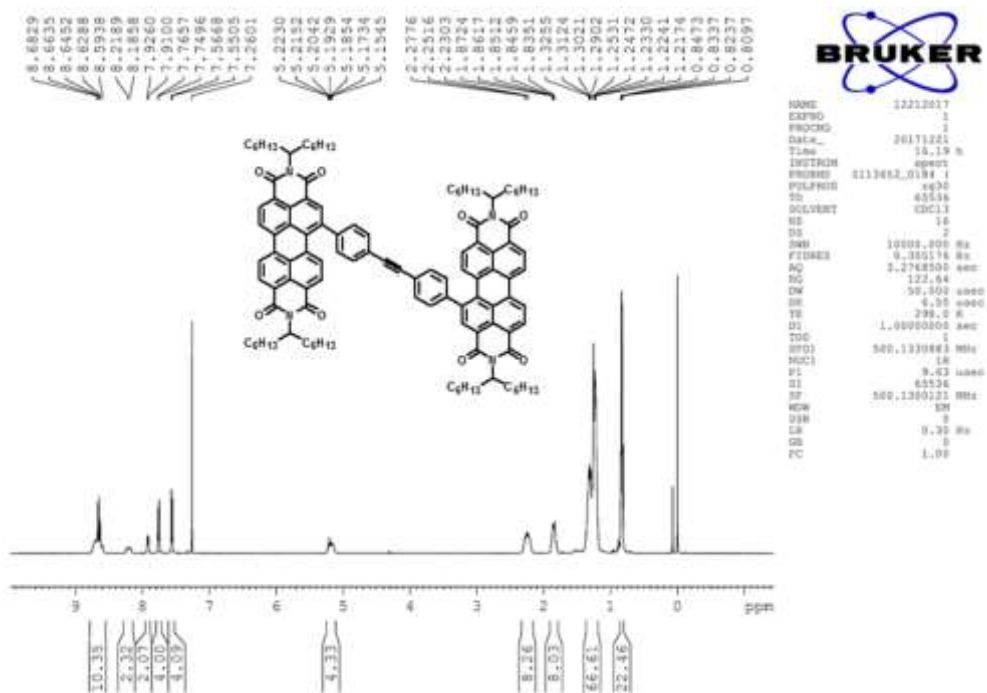

Figure S7. <sup>1</sup>H NMR spectrum of Compound 3.



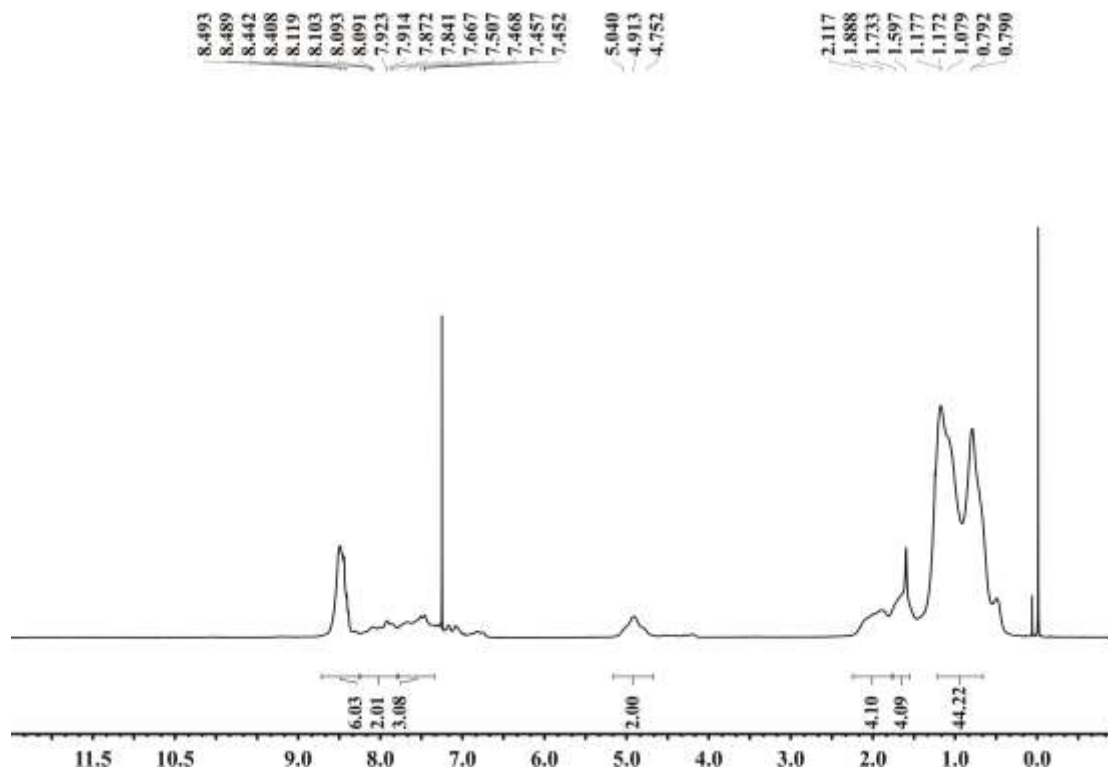

Figure S8.  $^1\text{H}$  NMR spectrum of HPB-PDI<sub>6</sub>.

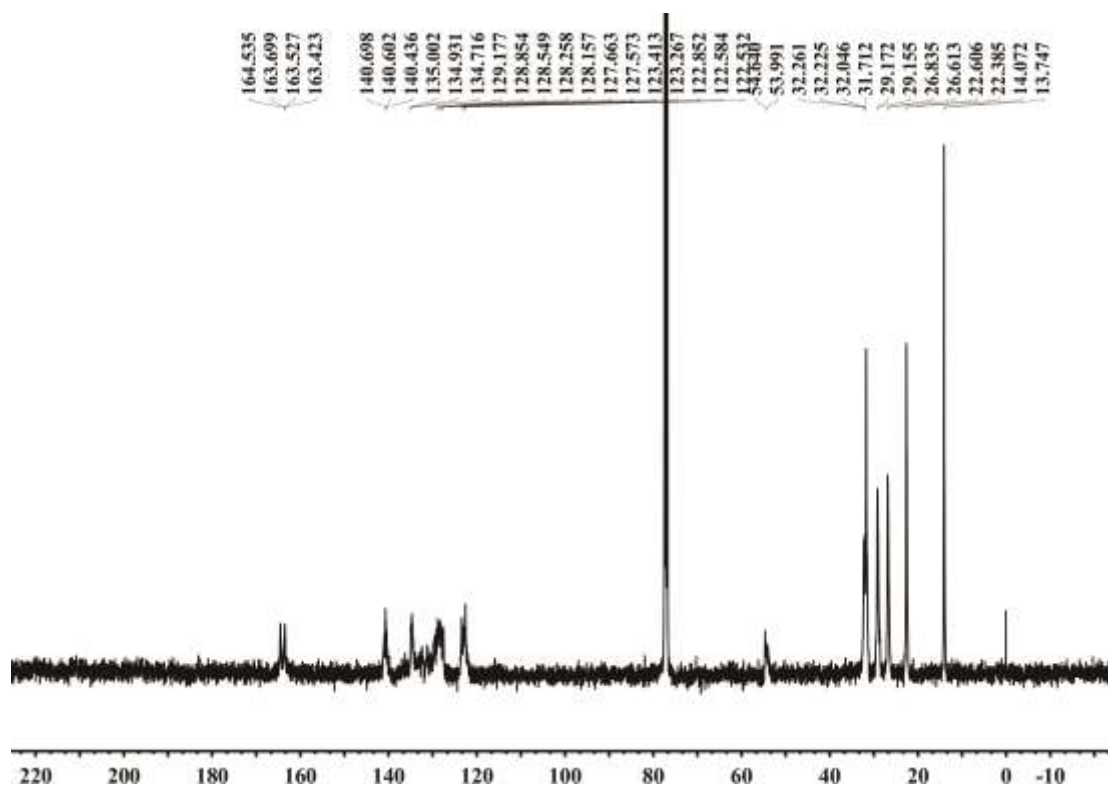

Figure S9.  $^{13}\text{C}$  NMR spectrum of HPB-PDI<sub>6</sub>.

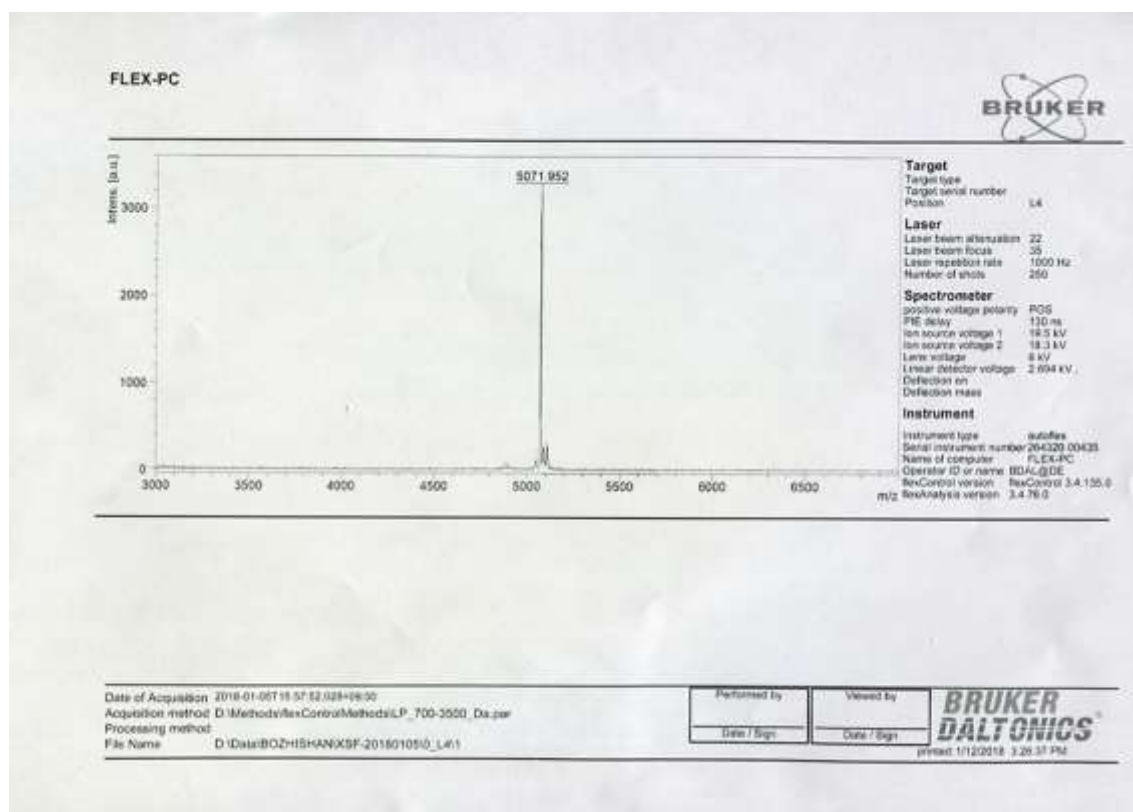

**Figure S10.** MALDI-TOF image of **HPB-PDI<sub>6</sub>**.

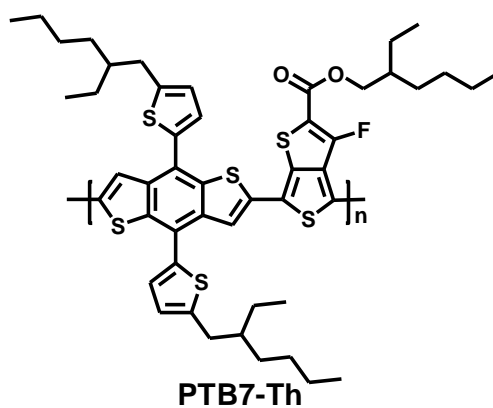

**Figure S11.** Chemical Structure of **PTB7-Th**

**Table S1.** Summary of the photovoltaic properties of **PTB7-Th: HPB-PDI<sub>6</sub>** based devices (DCB as solvent)

| Device(D:A) | $V_{oc}$ (V) | $J_{sc}$ (mA cm <sup>-2</sup> ) | $FF$ | PCE (%) |
|-------------|--------------|---------------------------------|------|---------|
| 1.5:1       | 0.91         | 12.39                           | 43.0 | 4.85    |
| 1.5:1       | 0.91         | 13.43                           | 41.7 | 5.08    |

|       |      |       |      |      |
|-------|------|-------|------|------|
| 1:1   | 0.89 | 13.18 | 43.5 | 5.12 |
| 1:1   | 0.92 | 14.01 | 45.0 | 5.80 |
| 1:1.5 | 0.88 | 13.27 | 41.0 | 4.78 |
| 1:1.5 | 0.88 | 13.27 | 41.0 | 4.78 |
| 1:2   | 0.87 | 11.31 | 38.8 | 3.79 |
| 1:2   | 0.91 | 11.10 | 39.3 | 3.98 |
| 1:2.5 | 0.91 | 9.90  | 37.4 | 3.38 |
| 1:2.5 | 0.91 | 10.73 | 39.1 | 3.84 |

---

| Device(D:A) | Additives | $V_{oc}$ (V) | $J_{sc}$ (mA cm <sup>-2</sup> ) | $FF$ | PCE (%) |
|-------------|-----------|--------------|---------------------------------|------|---------|
| 1:1         | ---       | 0.89         | 13.18                           | 43.5 | 5.12    |
|             | ---       | 0.90         | 12.64                           | 38.1 | 4.38    |
|             | 0.05%DIO  | 0.90         | 13.26                           | 43.7 | 5.20    |
|             | 0.05%DIO  | 0.90         | 14.76                           | 42.6 | 5.65    |
|             | 0.10%DIO  | 0.91         | 13.22                           | 47.8 | 5.77    |
|             | 0.10%DIO  | 0.92         | 14.32                           | 46.5 | 6.14    |
|             | 0.15%DIO  | 0.90         | 13.25                           | 45.1 | 5.40    |
|             | 0.15%DIO  | 0.91         | 13.88                           | 46.2 | 5.81    |
|             | 0.20%DIO  | 0.90         | 13.72                           | 43.4 | 5.37    |
|             | 0.20%DIO  | 0.91         | 13.81                           | 45.2 | 5.69    |

| Device(D:A) | Additives | Annealing       |  | $V_{oc}$ (V) | $J_{sc}$ (mA cm <sup>-2</sup> ) | $FF$ | PCE (%) |
|-------------|-----------|-----------------|--|--------------|---------------------------------|------|---------|
|             |           | Temperature(°C) |  |              |                                 |      |         |
| 1:1         | 0.10%DIO  | 100             |  | 0.91         | 13.89                           | 46.0 | 5.81    |
|             |           | 120             |  | 0.91         | 13.97                           | 46.4 | 5.91    |
|             |           | 140             |  | 0.91         | 14.74                           | 47.7 | 6.39    |
|             |           | 160             |  | 0.91         | 14.34                           | 47.8 | 6.23    |
|             |           | 180             |  | 0.87         | 13.67                           | 44.9 | 5.32    |

| Device(D:A) | Additives | Annealing       |       | $V_{oc}$ (V) | $J_{sc}$ (mA cm <sup>-2</sup> ) | $FF$ | PCE (%) |
|-------------|-----------|-----------------|-------|--------------|---------------------------------|------|---------|
|             |           | time(min/140°C) |       |              |                                 |      |         |
| 1:1         | 0.10%DIO  | 0               |       | 0.92         | 13.89                           | 46.0 | 5.81    |
|             |           | 0               |       | 0.91         | 13.98                           | 45.7 | 5.80    |
|             |           | 2               |       | 0.93         | 13.28                           | 47.0 | 5.84    |
|             |           | 2               |       | 0.91         | 13.63                           | 45.5 | 5.58    |
|             |           | 5               |       | 0.92         | 15.11                           | 48.0 | 6.63    |
|             |           | 5               |       | 0.92         | 14.74                           | 47.7 | 6.39    |
|             |           | 10              |       | 0.93         | 13.54                           | 47.3 | 6.00    |
|             |           | 10              |       | 0.90         | 14.21                           | 46.1 | 5.82    |
|             |           | 30              |       | 0.92         | 13.90                           | 46.3 | 5.95    |
|             |           | 30              |       | 0.91         | 14.07                           | 46.9 | 5.92    |
|             |           | 60              |       | 0.93         | 13.65                           | 48.9 | 6.23    |
| 60          |           | 0.91            | 14.14 | 47.6         | 6.08                            |      |         |

We have made 192 devices to get the optimized condition and the best 10 devices are listed in Table S2. The average PCE is  $6.23 \pm 0.05(\%)$ .

**Table S2.** The averaged 10 devices.

|    | $V_{oc}$ (V) | $J_{sc}$ (mA cm <sup>-2</sup> ) | $FF$ | PCE (%) |
|----|--------------|---------------------------------|------|---------|
| 1  | 0.92         | 14.35                           | 47.8 | 6.23    |
| 2  | 0.92         | 15.11                           | 48.0 | 6.63    |
| 3  | 0.92         | 14.74                           | 47.7 | 6.39    |
| 4  | 0.91         | 14.59                           | 46.4 | 6.08    |
| 5  | 0.92         | 14.27                           | 47.0 | 6.11    |
| 6  | 0.94         | 13.49                           | 48.3 | 6.12    |
| 7  | 0.93         | 13.64                           | 48.9 | 6.23    |
| 8  | 0.93         | 13.84                           | 47.9 | 6.19    |
| 9  | 0.92         | 14.32                           | 46.5 | 6.14    |
| 10 | 0.92         | 13.24                           | 50.4 | 6.14    |

S1 Y. Zhao, X. Li, Z. Wang, W. Yang, K. Chen, J. Zhao and G. G. Gurzadyan, *J. Phys. Chem. C.*, 2018, **7**, 3756-3772.

S2 M. Takase, A. Nakajima and T. Takeuchi, *Tetrahedron Lett.*, 2005, **46**, 1739-1742.
